# Supplementary material for: Transition to an Aquatic Habitat Permitted the Repeated Loss of the Pleiotropic KLK8 Gene in Mammals
Source: PubMed Central journal article supplement — Genome Biol Evol. 2017 Nov 14;9(11):3179–88. doi: 10.1093/gbe/evx239 (PMC5716171; doi:10.1093/gbe/evx239), 2017-11-14
Supplement: evx239_supp.pdf [file evx239_supp.pdf]

## Supplementary Information for

Transition to an aquatic habitat permitted the repeated loss of the pleiotropic KLK8 gene in mammals

Nikolai Hecker<sup>1,2</sup>, Virag Sharma<sup>1,2</sup> and Michael Hiller<sup>1,2\*</sup>

<sup>1</sup> Max Planck Institute of Molecular Cell Biology and Genetics, Dresden, Germany.

<sup>2</sup> Max Planck Institute for the Physics of Complex Systems, Dresden, Germany.

\*To whom correspondence should be addressed:

Michael Hiller

Computational Biology and Evolutionary Genomics, Max Planck Institute of Molecular Cell Biology and Genetics & Max Planck Institute for the Physics of Complex Systems, Dresden, Germany.

Tel: +49 351 210 2781

Fax: +49 351 210 1209

Email: [hiller@mpi-cbg.de](mailto:hiller@mpi-cbg.de)

The Supplementary Material contains

- Figures 1-5
- Tables 1-11

## A *KLK8* coding exon 2

### Genome alignment

```
Human TGGGTCCTTACAGCTGCCCACTGTAAAAACCgtgagtggatgatgggggcagaggtcagc
Dolphin TGTATCCTCACAGCAGCCCACTGT-----ggattccgggggcagaggtgggc
Killer whale TGTGTCTCACAGCAGCCCACTGTAAAAACTatgagtggattccgggagcagaggtgggc
```

### CESAR exon alignment

```
Human TGGGTCCTTACAGCTGCCCACTGTAAA-----AAACC
Dolphin TGTATCCTCACAGCAGCCCACTGTGGATTCCGGGGGCAGAGgtgggc
```

## B *KLK8* coding exon 5

### Genome alignment

```
Human CTGGACTGGATCAAGAAGATCATAGGCAGCAAGGGCTGAttctag
Manatee CTGGACTGGATCAAGAAGACCATAGGTAAC--GGGTTGATcctca
```

### CESAR exon alignment

```
Human CTGGACTGGATCAAGAAGATCATAGGCAGCAAGGGCTGA
Manatee CTGGACTGGATCAAGAAGACCATAGGTAAC---GGGTTGATCCTCAAAGAGTCCTAG
```

**Supplementary Figure 1:** Application of CESAR results in a conservative number of gene-inactivating mutations.

(A) The genome alignment shows that dolphin (but not killer whale) exon 2 exhibits a deletion that removes the last 8 bp of the exon and the first 6 bp of the intron (confirmed by SRA reads), which could be counted as a frameshift and a splice site mutation. However, CESAR searches for other potential splice site candidates that occur in the same reading frame, and found a consensus splice site candidate (red font) in dolphin. As a conservative approach, we do not show inactivating mutations but the resulting 9 bp insertion at the end of the exon in Figures 1 and 3.

(B) The genome alignment shows a 2 bp frameshifting deletion close to the stop codon in *KLK8* coding exon 5. CESAR reports an alignment with a frame-preserving 3 bp deletion (shown in Figures 1 and 3) and a reading frame that terminates 6 codons downstream.

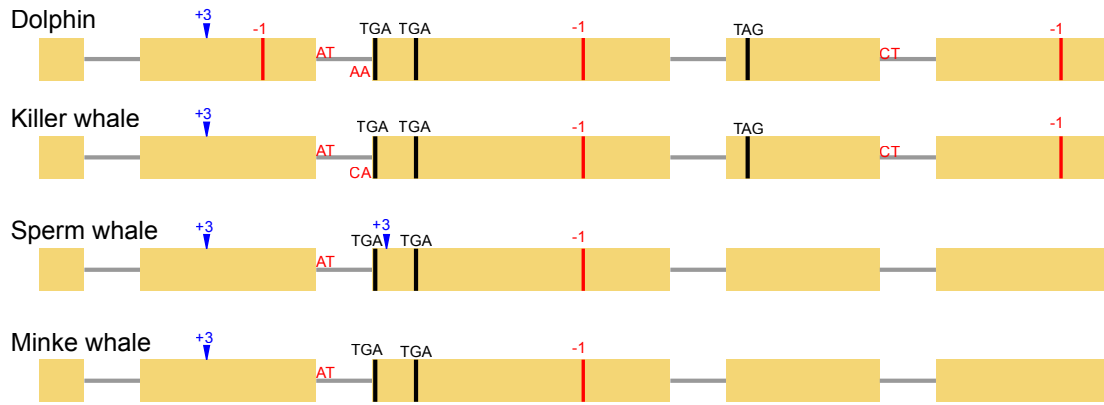

**Supplementary Figure 2: *KLK11* is lost in cetaceans.**

*KLK11* is a downstream target of *KLK8*, since the *KLK11* pro-enzyme was shown to be activated by *KLK8* *in vitro* (Eissa, et al. 2011). *KLK11* is also expressed in the epidermis (Komatsu, et al. 2005; Komatsu, et al. 2006) and hippocampus (Mitsui, et al. 2000); however, its functional role is unknown. Based on our observation that *KLK11* is not expressed in the dolphin skin (Figure 4), we inspected the coding sequence of this gene. As shown here, we found a number of inactivating mutations in the four cetacean species included in our genome alignment. Several mutations are shared between all four species, suggesting a common loss in the cetacean ancestor. All mutations are also supported by sequencing reads. *KLK11* has no inactivating mutations in manatee.

**A**

|                    |                                    |
|--------------------|------------------------------------|
| Genome (Human)     | CCCAGGATGTGATGCCCTGGAGTGCACCATCACA |
| Genome (Armadillo) | CCCAGGATG-GATGCCC-GGAG-ACACCACCACA |
| ti:1949622794      | CCCAGGATGTGATGCCCTGGAGAACACCACCACA |
| ti:553388016       | CCCAGGATGTGATGCCCTGGAGAACACCACCACA |
|                    | ***** ***** ***** ***** *****      |

**B**

|                           |                              |
|---------------------------|------------------------------|
| Genome (Human)            | GAGGATGCTT-ACCCGGGG          |
| Genome (Marmoset)         | GAGGATGCCT <b>T</b> ACCCAGAG |
| SRA:DRR036757.218821465.2 | GAGGATGCCT-ACCCAGAG          |
| SRA:DRR036757.217876685.1 | GAGGATGCCT-ACCCAGAG          |
| SRA:DRR036757.208735343.1 | GAGGATGCCT-ACCCAGAG          |
| SRA:DRR036757.190750292.2 | GAGGATGCCT-ACCCAGAG          |
|                           | ***** *****                  |

**Supplementary Figure 3:** Sequencing errors in *KLK8* exons in armadillo and marmoset.

Unassembled sequencing reads show that putative gene-inactivating mutations (frameshifts) in armadillo exon 5 (A) and marmoset exon 4 (B) are sequencing errors as the putative mutation that is present in the genome assembly is not supported by sequencing reads from the trace archive or the SRA. Note that there is no armadillo or marmoset read that confirms the inactivating mutation.

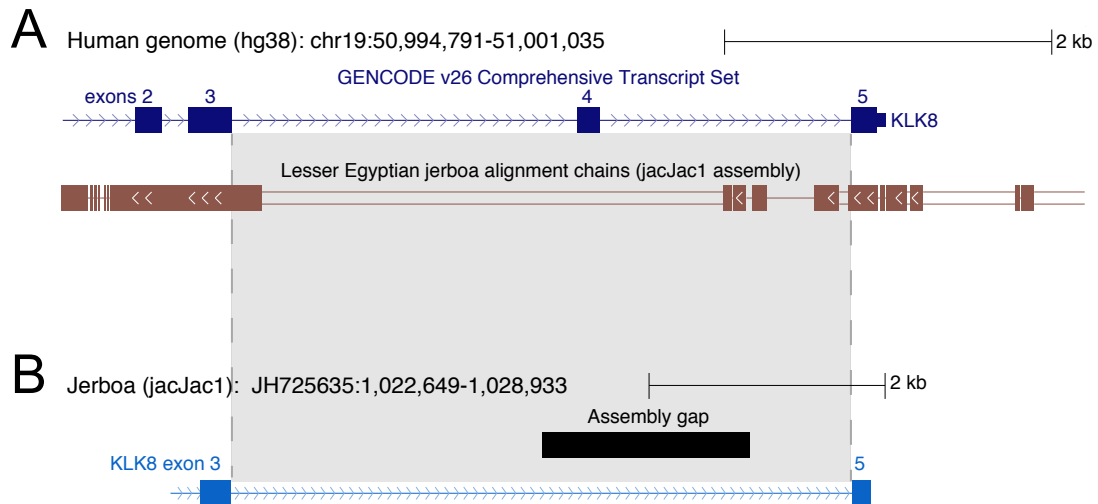

**Supplementary Figure 4:** *KLK8* exon 4 is not contained in the current jerboa genome assembly.

(A) UCSC genome browser screenshot of the human genome locus comprising *KLK8* coding exons 2-5 and the alignment chains to the jerboa genome. Blocks in the alignment chain indicate aligning regions, the double-line overlapping exon 4 shows that this exon does not align.

(B) The corresponding locus in the jerboa genome (grey box) contains a 1,759 bp assembly gap that overlaps the locus where exon 4 should reside, making it likely that the exon 4 sequence was not added to the genome assembly.

## A Alignment of human *KLK8* coding exon 3 (top) to pangolin (manPen1, bottom)

### Genome alignment

```

    gAAATACACAGTACGCTGGGAGACCACAGCCTACAGAATAAAGATGGCCAGAGCAAGAAATACC
ttacaggAAGTACACAGTATGCTGGGAGAGCACAGCCTGAAAAACAAGGAAGGATCAGAGCAAGAAATGGC
    *** *****

```

  

```

TGTGGTTCAGTCCATCCCACACCCCTGCTACAACAGCAGCGAT                               GTGGAGGACCA
TGTGGCTCAATCCATCCCACACCCCTGCTATGACAGCAGCAGT    Insert (1979bp)    ----AAGACCA
***** *** *****

```

  

```

CAACCATGATCTGATGCTTCTTCAACTGCGTGACCAGGCATCCCTGGGGTCCAAAGTGAAGCCCATCAGCCT
CAGACATGATCTGATGCTTATTCGACTACATGGTTGGGCATCCTGGGGTCCAAAGTGAAGCCCATCAACCT
** *****

```

  

```

GGCAGATCATTGCACCCAGCCTGGCCAGAAGTGACCCGCTCAGGCTGGGGCACTGTCACCAGTCCCCGAg
GACAGATCACTGCCCTCGATCTGGCCAGAAGTGACCATCTCGGGTGGGGCACAGTACCAGCCCTCAAggtagt
* *****

```

### CESAR alignment

```

    gAAATACACAGTACGCTGGGAGACCACAGCCTACAGAATAAAGATGGCCAGAGCAAGAAATACC
ttacaggAAGTACACAGTATGCTGGGAGAGCACAGCCTGAAAAACAAGGAAGGATCAGAGCAAGAAATGGC
    *** *****

```

  

```

TGTGGTTCAGTCCATCCCACACCCCTGCTACAACAGCAGCGATGTGGAGGACCACAACCATGATCTGATGCT
TGTGGCTCAATCCATCCCACACCCCTGCTATGACAGCAGCAGT----CAAGACCACAGACATGATCTGATGCT
***** *** *****

```

  

```

TCTTCAACTGCGTGACCAGGCATCCCTGGGGTCCAAAGTGAAGCCCATCAGCCTGGCAGATCATTGACCCCA
TATTCGACTACATGGTTGGGCATCCTGGGGTCCAAAGTGAAGCCCATCAACCTGACAGATCACTGCCCTCG
* ** * ** * ** *****

```

  

```

GCCTGGCCAGAAGTGACCCGCTCTCAGGCTGGGGCACTGTCACCAGTCCCCGAg
ATCTGGCCAGAAGTGACCCATCTCGGGTGGGGCACAGTACCAGCCCTCAAggtagt
***** ** * **

```

## B Alignment of human *KLK8* coding exon 1 (top) to naked mole rat (hetGla2, bottom)

### Genome alignment

```

    ATGGGACGCC---CGACCTCG---TGGCGCCAAGACGTGGATGTTCCCTGCTCTTCTGCTGGG--
gccccCTGGGATGCCCGCCCCGCCCCCGCCGTGCAGCCTGATGTGGACGGTCTGCTGCTGCTGCTGC
    ***** * ** ** * * ** * ** * ** *

```

  

```

-----GGAGCCTGGGCAg
TGCTGCTGCTGGCCTCTTGCCAggtgag
    * * ** * **

```

### CESAR alignment

```

    ATGGGACGCCCCGACCT---CGTGCGCCAAGACGTGG-----ATGTTCCCTGCTCTTG
cctgggATGCCCGCCCCGCCCCGCCGTGCAGCCTGATGTGGACGGTCTGCTGCTGCTGCTGCTGCTGCT
    *** ***** ** ***** * * ** * ** ** * ** * ** * **

```

  

```

CTGGGGGAGCCTGGGCAg
CTGCTGGCCTCTTGCCAggtgag
*** ** * ** * **

```

**Supplementary Figure 5: CESAR reveals an intact exon alignment for several species with putative gene-inactivating mutations in the genome alignment.**

(A) The genome alignment of *KLK8* coding exon 3 to the pangolin contains a 1.9 kb insertion in the middle of the exon, which would inactivate this exon due to the presence of in-frame stop codons. This insertion is the result of a

duplication in the pangolin manPen1 genome that copied the second half of the exon ~1.9 kb downstream. In contrast to the genome alignment, CESAR does not align the second half of the exon to the downstream duplication but aligns the exon as one block, which results in an alignment with an intact reading frame and consensus splice site, as shown here.

(B) The genome alignment of *KLK8* coding exon 1 to the naked mole rat contains two frameshifting 4 bp insertions and lacks the ATG start codon. In contrast, CESAR finds an intact exon alignment without frameshifts and an ATG, and two frame-preserving insertions.

Note that the identity of the genome and CESAR alignment is very similar in both cases, showing that both represent plausible nucleotide alignments. However, in contrast to CESAR, the genome alignment is not aware of the exon's reading frame, splice sites and the start codon in exon 1.

| Species                                | Genome assembly | Species             | Genome assembly |
|----------------------------------------|-----------------|---------------------|-----------------|
| Human                                  | hg38            | Bactrian camel      | camFer1         |
| Chimp                                  | panTro4         | Dolphin             | turTru2         |
| Bonobo                                 | panPan1         | Killer whale        | orcOrc1         |
| Gorilla                                | gorGor3         | Sperm whale         | phyCat1         |
| Orangutan                              | ponAbe2         | Minke whale         | balAcu1         |
| Gibbon                                 | nomLeu3         | Tibetan antelope    | panHod1         |
| Rhesus                                 | rheMac3         | Cow                 | bosTau8         |
| Crab-eating macaque                    | macFas5         | Bison               | bisBis1         |
| Baboon                                 | papAnu2         | Sheep               | oviAri3         |
| Green monkey                           | chlSab2         | Domestic goat       | capHir1         |
| Proboscis monkey                       | nasLar1         | Horse               | equCab2         |
| Golden snub-nosed monkey               | rhiRox1         | Rhinoceros          | cerSim1         |
| Marmoset                               | calJac3         | Cat                 | felCat8         |
| Squirrel monkey                        | saiBol1         | Dog                 | canFam3         |
| Tarsier                                | tarSyr2         | Ferret              | musFur1         |
| Bushbaby                               | otoGar3         | Panda               | ailMel1         |
| Mouse lemur                            | micMur2         | Polar bear          | ursMar1         |
| Chinese tree shrew                     | tupChi1         | Pacific walrus      | odoRosDiv1      |
| Squirrel                               | speTri2         | Weddell seal        | lepWed1         |
| Lesser Egyptian jerboa                 | jacJac1         | Chinese pangolin    | manPen1         |
| Prairie vole                           | micOch1         | Black flying-fox    | pteAle1         |
| Prairie deer mouse                     | perManBai1      | Megabat             | pteVam1         |
| Chinese hamster                        | criGri1         | Big brown bat       | eptFus1         |
| Golden hamster                         | mesAur1         | Davids myotis bat   | myoDav1         |
| Mouse                                  | mm10            | Microbat            | myoLuc2         |
| Rat                                    | rn6             | Hedgehog            | eriEur2         |
| Upper Galilee mountains blind mole rat | nanGal1         | Shrew               | sorAra2         |
| Naked mole-rat                         | hetGla2         | Star-nosed mole     | conCri1         |
| Guinea pig                             | cavPor3         | Elephant            | loxAfr3         |
| Chinchilla                             | chiLan1         | Cape elephant shrew | eleEdw1         |
| Brush-tailed rat                       | octDeg1         | Manatee             | triMan1         |
| Rabbit                                 | oryCun2         | Cape golden mole    | chrAsi1         |
| Pika                                   | ochPri3         | Tenrec              | echTel2         |
| Pig                                    | susScr3         | Aardvark            | oryAfe1         |
| Alpaca                                 | vicPac2         | Armadillo           | dasNov3         |

**Supplementary Table 1:** Species and their genome assemblies for which we analyzed the *KLK8* coding sequence.

| Species      | SRA accession          |
|--------------|------------------------|
| Dolphin      | SRX1136398, SRX1136399 |
| Killer whale | SRX188930, SRX188933   |
| Sperm whale  | SRX2447272, SRX2447273 |
| Minke whale  | SRX872217, SRX872216   |
| Manatee      | SRX091948, SRX091947   |
| Marmoset     | DRX032998, DRX033000   |

**Supplementary Table 2:** SRA identifiers that we used to validate the putative gene-inactivating mutations in *KLK8*. For dolphin, we also confirmed inactivating mutations and inferred intact versions of sequences with reads from the NCBI Trace Archive (Trace\Tursiops\_truncatus\_WGS).



|                                                                                                           |
|-----------------------------------------------------------------------------------------------------------|
| Dolphin sequence spanning breakpoint                                                                      |
| CCTTGGATTTGTCCCTTCATGGAAGCCCCGCCCTTTGCTTATGATTGGTCCCTTAGAGTCAGGGACAGCTGCTGCAG<br>CACAGCAAGATACCAGTTCTCA   |
| Killer whale sequence spanning breakpoint                                                                 |
| TCATGGAAGCCCCGCCCTTTGCTTATGATTGGTCCCTTAGAGTAAGGGACAGCCGCTGCAGCACAGCAAGATACCAGT<br>TCTCAGGTGTGATCATGACTGGA |

**Supplementary Table 3:** Genomic sequences spanning the breakpoint of the deletion that resulted in the loss of exon 5 in dolphin and killer whale. These genomic sequences are confirmed by several unassembled reads from the NCBI Trace archive and the SRA.

|                                                                                                             |
|-------------------------------------------------------------------------------------------------------------|
| Killer whale exon1 stop codon inactivating                                                                  |
| ATGGGACATCCACAGCTGCTGCAGAGTCAATCTAGATGTTCCCGCTTTGCTGTTGGAATCCCGGGCAG                                        |
| Killer whale exon 1 stop codon ancestral state                                                              |
| ATGGGACATCCACAGCTGCTGCAGAGTCAATCTGGATGTTCCCGCTTTGCTGTTGGAATCCCGGGCAG                                        |
| Killer whale exon 2 splice site inactivating                                                                |
| GTTTCATAGATGACCACTGTGTCTCACAGCAGCCCACTGTAAAAAACTATGAGTGGATTCCGGGAGCAGAGGTGGGCT<br>GGAGCCTGGGGCAAGAGGGGGC    |
| Killer whale exon 2 splice site ancestral state                                                             |
| GTTTCATAGATGACCACTGTGTCTCACAGCAGCCCACTGTAAAAAACTGTGAGTGGATTCCGGGAGCAGAGGTGGGCT<br>GGAGCCTGGGGCAAGAGGGGGC    |
| Killer whale exon 3 stop codon inactivating                                                                 |
| CCTGCTACAACAGCAGCAACAAGGACCACAACCATGATCTGATGCTCATTTGACCATGTGAATGGGCATCCCTGGGGCTC<br>AAAGTGAAGCCCATCAACCTGGC |
| Killer whale exon 3 stop codon ancestral state                                                              |
| CCTGCTACAACAGCAGCAACAAGGACCACAACCATGATCTGATGCTCATTCAACCATGTGAATGGGCATCCCTGGGGCTC<br>AAAGTGAAGCCCATCAACCTGGC |

**Supplementary Table 4:** Killer whale query sequences comprising the inactivating mutations that are present in its genome (red) and putative intact of versions of the sequences for which we replaced the inactivating mutations with the ancestral state (blue) inferred from the aligned cow sequences. While all sequences with inactivating mutations are confirmed by unassembled reads from the SRA and from sequencing data of distinct killer whale ecotypes (Supplementary Table 8), none of the putative intact sequences are confirmed.

|                                                                                                             |
|-------------------------------------------------------------------------------------------------------------|
| Dolphin exon 1 frame shift inactivating                                                                     |
| ATGGGACATCCCACAGCTGCTGCAGAGTCTGGATCTAGATGTTCCCGCTCTTGCCGTTGGAATCCCGGGCAG                                    |
| Dolphin exon 1 frame shift ancestral state                                                                  |
| ATGGGACATCCCACAGCTGCTGCAGTCTGGATCTAGATGTTCCCGCTCTTGCCGTTGGAATCCCGGGCAG                                      |
| Dolphin exon 3 stop codon inactivating                                                                      |
| CCTGCTACAACAGCAGCAACAAGGACCACAACCATGATCTGCTGCTCATTTGACCATGTGAACGGGCATCCCTGGGGCCC<br>AAAGTGAAGCCCATCAACCTGGC |
| Dolphin exon 3 stop codon ancestral state                                                                   |
| CCTGCTACAACAGCAGCAACAAGGACCACAACCATGATCTGCTGCTCATTCAACCATGTGAACGGGCATCCCTGGGGCCC<br>AAAGTGAAGCCCATCAACCTGGC |

**Supplementary Table 5:** Dolphin query sequences comprising the inactivating mutations that are present in its genome (red) and putative intact of versions of the sequences for which we replaced the inactivating mutations with the ancestral state (blue) inferred from the aligned cow sequences. While all sequences with inactivating mutations are confirmed by unassembled reads from the NCBI Trace Archive (Trace\Tursiops\_truncatus\_WGS), none of the putative intact sequences are confirmed.

|                                                                                                      |
|------------------------------------------------------------------------------------------------------|
| Minke whale exon 1 frame shift inactivating                                                          |
| GTGGGACATCCTACACCTGCTGCAGAGTCTGGATCTGGATGTTCCAGCTCTTGCTGTTGGAATCCCGGGCCG                             |
| Minke whale exon 1 frame shift ancestral state                                                       |
| GTGGGACATCCTACACCTGCTGCAGTCTGGATCTGGATGTTCCAGCTCTTGCTGTTGGAATCCCGGGCCG                               |
| Minke whale exon 2 stop codon inactivating                                                           |
| TGAGAGCACAGGAGACCAAGGTGCTGGAGGGCCAGGAGTGCAGGCCCATTAGCAGCCTTGGCAGACGGCCTTGTCCAGGGTGTCCGGCTAATATGTGGGA |
| Minke whale exon 2 stop codon ancestral state                                                        |
| TGAGAGCACAGGAGACCAAGGTGCTGGAGGGCCAGGAGTGCAGGCCCATCTCAGCCTTGGCAGACGGCCTTGTCCAGGGTGTCCGGCTAATATGTGGGA  |
| Minke whale exon 4 splice site inactivating                                                          |
| CTGTCTCTGGGAACTTGCAACCTCTGCCCCCTCGAGAATTTTCCTGACACCCTCAGCTGCGCAGAA                                   |
| Minke whale exon 4 splice site ancestral state                                                       |
| CTGTCTCTGGGAACTTGCAACCTCTGCCCCCTCAGAGAATTTTCCTGACACCCTCAGCTGCGCAGAA                                  |

**Supplementary Table 6:** Minke whale query sequences comprising the inactivating mutations that are present in its genome (red) and putative intact of versions of the sequences for which we replaced the inactivating mutations with the ancestral state (blue) inferred from the aligned cow sequences. All inactivating mutations could be confirmed by unassembled reads from the SRA. The sequence covering the ancestral state of the splice site mutation in exon 4 retrieved a single matching read (SRA:SRR1802585.28974202.1 SRX872217); however, given that the same SRA datasets provide overwhelming support (20 matching reads) for the sequence with the inactivated splice site, we can conclude that this read has a sequencing error at the mutated position.

|                                                                                                           |
|-----------------------------------------------------------------------------------------------------------|
| Manatee exon 1 splice site inactivating                                                                   |
| TTCCTGCTTTTCTGTTGGAAGCCTGGGCAGGGAAGGGGTTTGGGAAGGGGCTGGAACACA                                              |
| Manatee exon 1 splice site ancestral state                                                                |
| TTCCTGCTTTTCTGTTGGAAGCCTGGGCAGTGAAGGGGTTTGGGAAGGGGCTGGAACACA                                              |
| Manatee exon 3 stop codon 1 inactivating                                                                  |
| TACACAGTTTGCCTGGGAGATCACAGCCTGTAGAGTAAGGATGGGCTGGAGCAAGAAATGGCT                                           |
| Manatee exon 3 stop codon 1 ancestral state                                                               |
| TACACAGTTTGCCTGGGAGATCACAGCCTGCAGAGTAAGGATGGGCTGGAGCAAGAAATGGCT                                           |
| Manatee exon 3 stop codon 2 inactivating                                                                  |
| AGTTGGTAGATCGCTGCCCCAGGCTGGCCAGCTGTGCACCATCTCTGGCTGAGGCACTGTACCAGCCCCAAGTTACT<br>GGGCTTGGCCAGCACT         |
| Manatee exon 3 stop codon 2 ancestral state                                                               |
| AGTTGGTAGATCGCTGCCCCAGGCTGGCCAGCTGTGCACCATCTCTGGCTGGGCACTGTACCAGCCCCAAGTTACT<br>GGGCTTGGCCAGCACT          |
| Manatee exon 3 splice site inactivating                                                                   |
| GTGCACCATCTCTGGCTGAGGCACTGTCACCAGCCCCAAGTTACTGGGCTTGGCCAGCACTGTGAGAGAGAGGAGGAGT<br>TGGTGGGCCTAGTGAACCTCAA |
| Manatee exon 3 splice site ancestral state                                                                |
| GTGCACCATCTCTGGCTGAGGCACTGTCACCAGCCCCAAGTTACTGGGCTGGCCAGCACTGTGAGAGAGAGGAGGAGT<br>TGGTGGGCCTAGTGAACCTCAA  |

**Supplementary Table 7:** Manatee query sequences comprising the inactivating mutations that are present in its genome (red) and putative intact of versions of the sequences for which we replaced the inactivating mutations with the ancestral state (blue) inferred from the aligned elephant sequences. All inactivating mutations could be confirmed by unassembled reads from the SRA. Similarly to the minke whale case above (Supplementary Table 6), the “exon 3 stop codon 2” sequence with the ancestral state retrieved a single matching read (SRA:SRR331137.123171751.3 SRX091948); however, as in the minke whale case, the same SRA datasets provide 38 matching reads that support the gene-inactivating stop codon mutation. Thus, a A->G sequencing error (TGA->TGG) explains this single read.

| Accession  | exon 1 stop codon |           | exon 2 splice site |           | exon 3 stop codon |           |
|------------|-------------------|-----------|--------------------|-----------|-------------------|-----------|
|            | inactiv.          | ancestral | inactiv.           | ancestral | inactiv.          | ancestral |
| ERR637306  | 4                 | 0         | 0                  | 0         | 0                 | 0         |
| ERR637307  | 5                 | 0         | 7                  | 0         | 12                | 0         |
| ERR637308  | 6                 | 0         | 0                  | 0         | 1                 | 0         |
| ERR637309  | 1                 | 0         | 1                  | 0         | 3                 | 0         |
| ERR637310  | 5                 | 0         | 2                  | 0         | 2                 | 0         |
| ERR637311  | 0                 | 0         | 0                  | 0         | 0                 | 0         |
| ERR637312  | 3                 | 0         | 2                  | 0         | 1                 | 0         |
| ERR637313  | 0                 | 0         | 6                  | 0         | 4                 | 0         |
| ERR637314  | 3                 | 0         | 1                  | 0         | 3                 | 0         |
| ERR637315  | 5                 | 0         | 6                  | 0         | 2                 | 0         |
| ERR637316  | 3                 | 0         | 2                  | 0         | 3                 | 0         |
| ERR637317  | 2                 | 0         | 0                  | 0         | 3                 | 0         |
| ERR637318  | 3                 | 0         | 2                  | 0         | 3                 | 0         |
| ERR637319  | 2                 | 0         | 1                  | 0         | 1                 | 0         |
| ERR637320  | 1                 | 0         | 0                  | 0         | 0                 | 0         |
| ERR637321  | 1                 | 0         | 1                  | 0         | 3                 | 0         |
| ERR637322  | 3                 | 0         | 4                  | 0         | 4                 | 0         |
| ERR637323  | 2                 | 0         | 1                  | 0         | 0                 | 0         |
| ERR637324  | 5                 | 0         | 2                  | 0         | 2                 | 0         |
| ERR637325  | 0                 | 0         | 2                  | 0         | 4                 | 0         |
| ERR637326  | 2                 | 0         | 4                  | 0         | 1                 | 0         |
| ERR637327  | 3                 | 0         | 5                  | 0         | 2                 | 0         |
| ERR637328  | 1                 | 0         | 3                  | 0         | 5                 | 0         |
| ERR637329  | 4                 | 0         | 1                  | 0         | 2                 | 0         |
| ERR637330  | 2                 | 0         | 6                  | 0         | 5                 | 0         |
| ERR637331  | 1                 | 0         | 2                  | 0         | 3                 | 0         |
| ERR637332  | 5                 | 0         | 0                  | 0         | 3                 | 0         |
| ERR637333  | 2                 | 0         | 1                  | 0         | 1                 | 0         |
| ERR637334  | 2                 | 0         | 0                  | 0         | 0                 | 0         |
| ERR637335  | 0                 | 0         | 0                  | 0         | 1                 | 0         |
| ERR637336  | 2                 | 0         | 1                  | 0         | 4                 | 0         |
| ERR637337  | 3                 | 0         | 2                  | 0         | 5                 | 0         |
| ERR637338  | 0                 | 0         | 2                  | 0         | 5                 | 0         |
| ERR637339  | 0                 | 0         | 1                  | 0         | 3                 | 0         |
| ERR637340  | 0                 | 0         | 4                  | 0         | 1                 | 0         |
| ERR637341  | 7                 | 0         | 8                  | 0         | 6                 | 0         |
| ERR637342  | 1                 | 0         | 1                  | 0         | 1                 | 0         |
| ERR637343  | 5                 | 0         | 5                  | 0         | 8                 | 0         |
| ERR637344  | 1                 | 0         | 3                  | 0         | 4                 | 0         |
| ERR637345  | 1                 | 0         | 0                  | 0         | 0                 | 0         |
| ERR637346  | 2                 | 0         | 4                  | 0         | 3                 | 0         |
| ERR637347  | 3                 | 0         | 3                  | 0         | 4                 | 0         |
| ERR637348  | 2                 | 0         | 2                  | 0         | 3                 | 0         |
| ERR637349  | 0                 | 0         | 1                  | 0         | 0                 | 0         |
| ERR637350  | 2                 | 0         | 2                  | 0         | 5                 | 0         |
| ERR637351  | 1                 | 0         | 1                  | 0         | 1                 | 0         |
| ERR637352  | 1                 | 0         | 2                  | 0         | 3                 | 0         |
| ERR637353  | 0                 | 0         | 2                  | 0         | 2                 | 0         |
| <b>SUM</b> | <b>107</b>        | <b>0</b>  | <b>106</b>         | <b>0</b>  | <b>132</b>        | <b>0</b>  |

**Supplementary Table 8:** Sequencing data of 48 killer whale individuals from five distinct ecotypes confirm that *KLK8* is lost throughout different killer whale populations.

The number of sequencing reads that confirm inactivating mutations (inactiv.) and intact ancestral state sequences (Supplementary Table 4) is shown for 48 killer whale individuals (Foote, et al. 2016). The respective European Nucleotide Archive (Cochrane, et al. 2013) accessions are listed.

| Gene        | $r_{\text{mean:exon/intron}}$ | $r_{\text{med:exon/intron}}$ | $e_{\text{mean:exon}}$ | $e_{\text{mean:intron}}$ | $e_{\text{med:exon}}$ | $e_{\text{med:intron}}$ |
|-------------|-------------------------------|------------------------------|------------------------|--------------------------|-----------------------|-------------------------|
| <i>KLK9</i> | 11.4                          | 14.4                         | 5818                   | 510                      | 7219                  | 503                     |
| <i>KLK8</i> | 1.0                           | 1.4                          | 256                    | 249                      | 246                   | 171                     |
| <i>KLK7</i> | 32.0                          | 34.9                         | 52517                  | 1640                     | 56669                 | 1623                    |
| <i>KLK6</i> | 14.4                          | 15.2                         | 22281                  | 1548                     | 23269                 | 1532                    |
| <i>KLK4</i> | 1.3                           | 3.3                          | 76                     | 57                       | 90                    | 27                      |

**Supplementary Table 9:** Exon and intron expression levels in the *KLK* gene locus based on dolphin RNA-seq data. For the genes on the same scaffold as *KLK8* (JH479757), we calculated the mean and median read coverage for each exon and intron using reads from all 116 samples of the dolphin skin RNA-seq data set (GEO-accession: GSE90941). For each gene, we then averaged the exon and intron values to obtain a per-gene exon and intron expression level ( $e_{\text{mean:exon}}$  and  $e_{\text{mean:intron}}$ ). Similarly, we computed the per-exon and per-intron median of all 116 samples and then computed the median of the exon/intron values for each gene, obtaining  $e_{\text{med:exon}}$  and  $e_{\text{med:intron}}$ .  $r_{\text{mean:exon/intron}}$  or  $r_{\text{med:exon/intron}}$  refer to the ratio between mean exon and mean intron expression or the ratio between median exon and median intron expression, respectively. An expressed multi-exon gene is expected to exhibit much higher exon than intron expression levels (large ratios), which we observed for *KLK6/7/9* that are clearly expressed in these RNA-seq datasets (Figure 4). Genes which are not expressed in these dolphin skin samples are expected to have (i) ratios close to 1, indicating background expression levels, and (ii) overall lower exon expression levels compared to expressed genes. This was observed for the inactivated *KLK8* and for *KLK4*, which is expressed in the prostate and developing teeth. These results corroborate the data shown in Figure 4 that *KLK8* is not expressed in dolphin skin.

| SRA accession | Gene        | Exon 1 | Exon 2 | Exon 3 | Exon 4 | Exon 5 |
|---------------|-------------|--------|--------|--------|--------|--------|
| SRX220351     | <i>KLK8</i> | 29     | 57     | 57     | 0      | 0      |
| SRX220351     | <i>KLK7</i> | 6616   | >20000 | >20000 | >20000 | >20000 |

**Supplementary Table 10:** *KLK8* is not expressed in the sperm whale skin. The table shows the read counts, obtained with a Megablast search for the five coding exons of sperm whale *KLK7* and *KLK8*. For *KLK7*, which is located next to *KLK8*, we found thousands of reads for all exons, showing that this gene is clearly expressed. In contrast, we found not a single read for *KLK8* exon 4 and 5, and only a small number of reads for the first three coding exons. The expression ratio between *KLK7* and *KLK8* is at least 1:228, suggesting that the expression of *KLK8* is negligibly small. SRX220351 is part of a study of five sperm whale samples (SRA accession: SRP016870). For the other samples (SRX220352-SRX220358), Megablast did not find any reads aligning to *KLK8* exons.

| Test set      | p-value     | Test set   |            |            | Background   |              |             |
|---------------|-------------|------------|------------|------------|--------------|--------------|-------------|
|               |             | $\omega_1$ | $\omega_2$ | $\omega_3$ | $\omega_1$   | $\omega_2$   | $\omega_3$  |
| Sperm whale   | $< 10^{-4}$ | 1 (1.7%)   | 1 (20.5%)  | 1 (77.8%)  | 0.08 (77.8%) | 0.81 (20.5%) | 8.49 (1.7%) |
| Fully-aquatic | $< 10^{-5}$ | 1 (87.8%)  | 1 (10.1%)  | 1 (2.1%)   | 0.13 (87.8%) | 1 (10.1%)    | 7.46 (2.1%) |

**Supplementary Table 11:** Neutral evolution of *KLK8* in the sperm whale and in the fully-aquatic lineages.

Relaxation of selection rates computed with RELAX (Wertheim, et al. 2015) for the sperm whale branch and all branches associated with fully-aquatic species (cetaceans, manatee), compared with all branches associated with non-fully-aquatic species as a background set.  $\omega_1$ ,  $\omega_2$  and  $\omega_3$  refer to the estimated dN/dS values and parenthesis indicate the proportion of codons per  $\omega$  class.

## References

- Cochrane G, Alako B, Amid C, Bower L, Cerdeno-Tarraga A, Cleland I, Gibson R, Goodgame N, Jang M, Kay S, et al. 2013. Facing growth in the European Nucleotide Archive. *Nucleic acids research* 41:D30-35.
- Eissa A, Amodeo V, Smith CR, Diamandis EP. 2011. Kallikrein-related peptidase-8 (KLK8) is an active serine protease in human epidermis and sweat and is involved in a skin barrier proteolytic cascade. *The Journal of biological chemistry* 286:687-706.
- Foote AD, Vijay N, Avila-Arcos MC, Baird RW, Durban JW, Fumagalli M, Gibbs RA, Hanson MB, Korneliussen TS, Martin MD, et al. 2016. Genome-culture coevolution promotes rapid divergence of killer whale ecotypes. *Nat Commun* 7:11693.
- Komatsu N, Saijoh K, Toyama T, Ohka R, Otsuki N, Hussack G, Takehara K, Diamandis EP. 2005. Multiple tissue kallikrein mRNA and protein expression in normal skin and skin diseases. *Br J Dermatol* 153:274-281.
- Komatsu N, Tsai B, Sidiropoulos M, Saijoh K, Levesque MA, Takehara K, Diamandis EP. 2006. Quantification of eight tissue kallikreins in the stratum corneum and sweat. *J Invest Dermatol* 126:925-929.
- Mitsui S, Yamada T, Okui A, Kominami K, Uemura H, Yamaguchi N. 2000. A novel isoform of a kallikrein-like protease, TLSP/hippostasin, (PRSS20), is expressed in the human brain and prostate. *Biochem Biophys Res Commun* 272:205-211.
- Wertheim JO, Murrell B, Smith MD, Kosakovsky Pond SL, Scheffler K. 2015. RELAX: detecting relaxed selection in a phylogenetic framework. *Mol Biol Evol* 32:820-832.
